# Supplementary material for: Reproductive strategies in loggerhead sea turtle Caretta caretta: polyandry and polygyny in a Southwest Atlantic rookery
Source: PeerJ. 2025 Jan 7;13:e18714. doi: 10.7717/peerj.18714 (PMC11720971; doi:10.7717/peerj.18714)
Supplement: Supplemental Information 4 — The input data used for paternity analysis with the COLONY 2.0 software (Jones & Wang, 2010). (1) Offspring Genotype Data: The genotype information of the offspring analyzed in the study; (2) Female Genotype Data: The genotype information of the females used in the analysis; (3) Known Maternity Data: Information indicating the known maternal relationships for each offspring; (4) COLONY Parameters: The specific parameters used in the COLONY 2.0 software; (5) Result Data: Output data generated by COLONY 2.0, detailing the maximum likelihood estimation of the number of potential fathers for each nest. [file peerj-13-18714-s004.xlsx]

## Sheet: Offspring genotype data
Offspring	CC1G03-1	CC1G03-2	CC1F01-1	CC1F01-2	CC1G02-1	CC1G02-2	CCP7D04-1	CCP7D04-2
CC18	309	329	316	320	292	300	363	363
CC19	289	305	316	320	292	304	363	363
CC20	309	329	316	320	292	300	343	363
CC21	305	329	316	320	292	300	363	363
CC23	305	329	316	320	296	300	363	363
CC25	309	329	316	320	292	304	343	359
CC26	305	329	316	320	296	304	343	359
CC27	309	329	316	328	292	304	343	363
CC28	289	309	316	328	296	300	0	0
CC29	289	309	316	328	0	0	363	363
CC30	289	305	316	328	296	300	363	363
CC31	309	329	316	320	296	304	359	363
CC32	309	329	316	320	292	304	363	363
CC34	305	329	316	328	292	300	343	363
CC36	289	309	316	328	296	300	343	359
B9	0	0	316	320	296	300	367	375
B8	305	309	324	324	296	296	359	367
B12	305	309	320	336	296	296	367	375
B13	309	321	316	320	296	300	359	367
B14	0	0	316	316	296	296	359	375
B16	309	321	324	336	296	296	367	375
A8	289	309	312	316	284	308	347	359
A9	289	309	312	324	280	284	359	367
A11	289	305	312	316	280	280	347	371
A12	289	305	312	324	280	308	347	371
A13	301	305	316	324	284	308	347	359
A14	289	309	312	324	284	308	347	371
A15	301	309	316	324	280	280	347	371
A16	301	309	312	316	280	280	367	371
A17	301	309	316	324	280	280	359	367
A18	301	305	312	316	280	284	347	371
A19	301	305	312	324	284	308	367	371
A20	301	305	316	324	284	308	347	359
A21	301	305	312	316	280	308	359	367
A22	301	305	312	324	280	280	367	371
A23	301	309	316	324	280	308	347	371
A24	289	309	312	316	280	284	359	367
A25	289	305	312	324	280	284	347	371
A26	289	305	312	316	284	308	367	371
A27	289	305	312	316	284	308	359	367
E25	305	309	320	324	300	300	367	375
E26	0	0	324	324	284	288	367	375
E27	301	309	324	324	284	300	367	371
E28	301	309	320	324	300	300	367	375
E29	305	305	324	328	288	300	367	367
E30	305	309	320	324	284	288	367	371
E32	0	0	324	328	280	288	359	367
E33	305	309	324	324	288	300	367	375
E34	305	309	320	324	284	288	367	375
E35	305	309	324	324	284	288	367	371
E36	305	309	324	324	300	300	367	371
E37	301	309	320	324	300	300	367	375
E38	301	309	324	324	300	300	367	375
E39	305	309	324	324	284	300	367	375
E40	301	309	324	324	284	300	367	375
I5	305	309	324	328	288	292	359	359
I6	289	329	316	336	288	300	359	359
I8	289	329	316	328	288	300	359	363
I9	309	329	316	328	276	300	359	363
I15	309	329	336	336	288	300	359	363
I16	289	305	324	336	276	300	359	359
I17	329	329	0	0	276	300	359	363
I18	305	309	316	336	276	300	359	359
C5	325	325	320	344	292	300	343	367
C4	309	325	320	336	288	300	0	0
C8	309	329	324	344	292	300	363	367
C10	325	329	324	336	288	292	343	367
C21	325	329	320	336	292	300	343	367
C22	325	329	324	336	288	300	363	367
C23	325	329	324	336	288	292	343	367
J22	305	309	320	324	288	288	363	363
J23	289	305	324	324	288	288	363	367
J24	305	309	320	364	288	288	363	367
J25	289	305	320	364	264	288	363	363
J26	289	305	324	324	264	288	363	363
J27	289	305	320	324	264	288	363	367
J28	305	309	324	324	288	288	363	367
J29	305	309	320	364	288	288	363	363
J30	289	305	324	324	264	288	363	367
J31	305	309	320	364	288	288	363	367
J32	289	305	324	324	288	288	363	363
J33	289	305	320	364	264	288	363	367
J34	289	305	320	364	264	288	363	363
J35	0	0	320	364	288	288	363	367
F8	305	309	312	316	296	300	359	367
F9	305	313	312	316	300	300	363	367
F10	309	313	0	0	288	300	359	367
F16	305	309	312	312	296	300	359	367
F17	305	305	312	312	296	296	359	367
O25	305	305	316	328	280	300	363	371
O27	277	305	316	336	280	300	363	379
O28	277	305	316	316	280	300	363	371
O29	305	325	316	328	280	300	363	371
O20	305	305	316	328	280	300	367	371
O22	277	277	316	316	260	300	367	371
O24	277	325	316	316	280	300	367	371
P3	309	325	0	0	268	308	359	375
P22	309	325	0	0	308	308	359	375
P23	309	325	0	0	308	308	359	375
P15	277	309	320	324	268	308	359	375
P16	0	0	320	320	268	308	359	363
P18	325	333	320	336	296	308	359	375
P21	277	333	320	324	268	308	359	363
R18	305	313	316	324	288	292	363	367
R19	289	313	316	324	288	300	347	367
R20	289	313	316	316	292	300	347	371
R21	305	309	324	324	288	292	363	367
R22	305	309	324	324	288	292	363	367
T2	313	329	312	312	260	276	359	359
T3	313	329	312	312	260	264	359	363
T4	0	0	312	312	260	288	359	363
T5	277	309	312	336	260	288	359	363
T6	277	329	312	336	260	288	367	379
T9	0	0	312	312	260	276	359	359
T10	309	313	312	312	264	276	359	359
U25	301	309	316	348	284	288	363	371
U26	277	309	316	316	284	300	343	367
U27	277	309	316	348	284	288	343	363
U29	301	305	316	316	284	300	363	375
U30	277	305	312	348	288	304	363	371
U31	277	309	316	348	300	304	363	371
U32	301	305	316	348	288	304	343	363
U33	301	305	312	316	284	288	343	367
U34	301	305	312	348	288	304	363	371
U35	309	309	312	348	288	304	363	363
U36	277	305	316	316	288	304	343	363
U37	277	309	316	316	284	288	343	367
X13	309	309	316	316	280	288	367	367
X14	309	309	316	316	280	292	367	367
X15	309	309	316	336	280	292	367	367
X16	309	309	316	336	264	292	347	367
X17	309	309	316	316	264	288	347	367
X18	309	309	316	336	264	288	367	367
X19	309	309	316	336	280	292	367	367
X20	309	325	316	336	288	288	367	367
X21	309	309	316	316	280	292	347	367
X22	309	309	316	324	264	288	347	367
X24	309	309	316	316	280	292	347	367
X25	309	309	316	336	280	292	367	367
V28	289	305	324	324	284	292	363	363
V29	289	305	312	316	284	292	359	363
V30	289	305	316	324	284	296	363	363
V31	289	289	312	316	284	292	359	363
V32	289	305	312	324	284	296	363	363
V33	289	305	316	324	292	300	359	363
V34	289	305	316	324	296	300	359	363
V35	289	305	324	324	296	300	359	363
V37	289	305	324	324	296	300	363	363
V38	289	305	324	324	296	300	363	363
V39	289	289	312	324	284	292	359	363
V40	289	305	312	316	284	292	359	363
V41	289	305	312	316	284	292	363	363
V42	289	289	316	324	284	296	359	363
V43	289	305	312	324	284	292	359	363
V44	289	305	312	324	296	300	359	363
V45	289	305	324	324	284	296	359	363
V46	289	289	324	324	296	300	359	363
Y20	305	309	316	320	288	296	359	367
Y21	309	309	320	328	0	0	343	371
Y22	305	309	320	324	292	292	343	367
Y23	301	305	324	324	288	296	359	371
Y24	301	309	324	324	276	292	359	367
Y25	301	305	324	324	276	288	343	367
Y26	305	309	320	324	276	288	359	367
Y27	301	309	316	324	292	292	359	371
Y28	309	309	316	320	288	296	343	367
Y30	305	309	316	320	276	292	343	367
Y31	305	309	316	320	276	288	359	371
Y32	301	305	324	324	276	292	359	367
Z13	301	329	320	324	276	288	0	0
Z14	309	313	320	324	276	288	343	399
Z16	309	313	320	320	276	304	0	0
Z18	309	313	320	324	304	304	343	359
Z21	309	329	320	324	304	304	343	399
Z22	301	313	324	324	276	288	359	367
Z23	309	333	320	328	0	0	343	359
Z24	301	329	320	324	304	304	367	399
Z25	309	333	320	320	0	0	343	359
Z26	309	313	320	324	276	288	343	359
Z28	309	313	320	320	276	288	343	399
Z29	301	313	320	324	276	304	343	359
Z30	309	313	320	324	304	304	343	359
Z31	309	329	324	324	288	304	343	399
Z32	309	329	324	324	288	304	367	399
SMV-337	305	333	324	336	300	300	363	371
SMV-338	305	333	324	336	288	300	363	371
SMV-339	305	313	324	336	300	300	363	371
SMV-340	305	333	324	336	288	300	363	367
SMV-341	305	313	316	336	288	300	363	371
SMV-342	305	333	324	336	300	300	363	363
SMV-343	305	313	324	336	288	300	363	371
SMV-345	305	313	316	336	300	300	363	363
SMV-346	305	333	324	336	300	300	363	367
SMV-347	305	313	316	336	300	300	363	371
SMV-348	305	333	316	336	288	304	363	367
SMV-349	305	313	324	336	0	0	363	371
SMV-351	305	333	316	336	300	300	367	371
SMV-352	305	313	316	336	300	300	363	367
SMV-353	0	0	324	336	300	300	363	363
SMV-355	305	313	324	336	288	300	363	371
SMV-356	305	333	324	336	300	300	363	371
SMV-405	289	309	332	332	0	0	343	343
SMV-406	269	309	316	332	300	304	335	343
SMV-409	289	305	316	332	288	300	335	343
SMV-417	269	305	316	316	288	304	0	0
SMV-420	269	305	324	332	288	300	335	343
SMV-425	297	313	316	320	276	304	379	379
SMV-426	309	313	316	320	288	304	359	371
SMV-427	297	297	316	324	268	288	0	0
SMV-428	309	313	316	320	288	304	0	0
SMV-429	309	313	316	320	276	276	0	0
SMV-431	313	313	316	320	276	304	359	379
SMV-432	0	0	316	320	288	304	359	371
SMV-433	297	313	316	320	268	276	371	379
SMV-434	297	313	316	320	268	276	379	379
SMV-436	313	313	316	324	276	304	359	379
SMV-437	0	0	316	324	288	304	359	371
SMV-438	297	309	316	320	276	304	379	379
SMV-439	297	313	316	320	276	304	379	379
SMV-441	313	313	316	324	288	304	359	371
SMV-442	297	313	316	320	268	276	379	379
SMV-443	277	309	316	324	268	292	359	363
SMV-444	277	309	316	316	296	308	359	371
SMV-445	277	305	316	324	292	296	343	363
SMV-446	277	277	316	324	268	292	343	363
SMV-447	305	309	316	324	268	292	359	363
SMV-448	277	305	0	0	292	296	343	363
SMV-449	277	305	316	316	296	308	343	371
SMV-450	305	309	324	324	268	292	359	363
SMV-451	277	277	316	316	292	296	359	363
SMV-452	277	305	0	0	268	292	343	363
SMV-453	277	305	316	324	268	308	343	363
SMV-454	277	277	324	324	268	292	343	371
SMV-455	277	277	316	324	292	296	359	371
SMV-456	305	309	324	324	268	308	359	363
SMV-457	277	309	324	324	268	308	359	371
SMV-458	305	309	316	324	292	296	359	359
SMV-459	305	309	316	324	296	308	359	371
SMV-460	277	309	316	324	268	292	343	371
SMV-461	277	277	316	316	296	308	359	371
SMV-462	277	305	316	316	268	292	343	371
SMV-468	301	305	312	336	300	300	359	363
SMV-469	321	325	316	324	280	300	359	363
SMV-470	321	325	312	316	280	288	359	363
SMV-471	301	305	312	316	280	300	343	363
SMV-472	321	325	324	336	280	300	343	363
SMV-473	301	321	316	324	300	300	343	363
SMV-474	301	305	312	316	288	300	359	363
SMV-475	301	321	312	336	280	288	343	363
SMV-476	301	305	312	336	280	300	343	363
SMV-477	321	325	312	336	280	300	343	367
SMV-478	321	325	324	336	280	300	359	363
SMV-479	305	325	316	324	280	300	343	363
SMV-480	301	321	0	0	280	300	343	367
SMV-481	301	305	312	316	288	300	359	367
SMV-482	321	325	312	316	280	300	359	367
SMV-483	305	325	316	324	280	288	359	363
SMV-484	301	321	324	336	280	288	359	367
SMV-485	301	305	312	336	280	300	343	363
SMV-486	301	321	316	324	300	300	343	363
SMV-487	305	325	312	336	280	288	359	363
SMV-488	305	305	324	336	296	296	363	367
SMV-489	289	309	316	336	0	0	347	367
SMV-490	305	309	316	336	268	300	347	359
SMV-491	289	305	316	336	296	300	347	367
SMV-492	305	309	316	336	268	296	347	359
SMV-493	305	309	324	336	296	296	359	363
SMV-494	305	305	324	336	296	300	363	367
SMV-495	289	309	316	336	268	296	363	367
SMV-496	289	309	324	336	296	300	347	359
SMV-497	289	305	316	336	268	300	347	359
SMV-498	305	305	316	336	268	296	347	359
SMV-499	0	0	316	336	296	300	347	367
SMV-500	305	305	316	336	268	300	347	367
SMV-502	305	309	324	336	268	296	363	367
SMV-503	305	309	316	336	296	296	363	367
SMV-505	305	305	324	336	296	296	363	367
SMV-507	305	305	324	336	268	300	363	367
SMV-510	293	305	320	336	268	292	359	367
SMV-511	293	305	316	320	276	300	359	363
SMV-512	305	309	320	336	292	300	359	363
SMV-513	293	305	316	320	276	300	359	367
SMV-514	0	0	316	320	292	300	359	359
SMV-515	293	305	324	336	268	292	359	367
SMV-516	305	309	324	336	292	300	359	363
SMV-517	305	309	324	336	268	276	363	367
SMV-518	293	309	320	336	276	300	359	367
SMV-519	293	309	324	336	268	276	363	367
SMV-520	305	305	316	324	268	292	359	363
SMV-521	305	309	324	336	276	300	0	0
SMV-522	305	305	324	336	268	276	359	359
SMV-523	305	305	320	336	292	300	359	367
SMV-524	305	305	316	320	276	300	0	0
SMV-525	305	309	324	336	268	292	359	367
SMV-526	305	309	324	336	292	300	363	367
SMV-527	293	309	0	0	268	292	359	367
SMV-528	305	305	316	320	292	300	359	367
SMV-529	305	309	316	320	276	300	363	367
SMV-540	277	289	316	316	260	288	367	367
SMV-542	277	289	316	316	260	288	363	367
SMV-543	277	309	316	316	260	288	343	367
SMV-545	309	325	316	316	288	292	367	367
SMV-546	277	309	316	316	288	292	363	367
SMV-547	289	325	316	316	288	292	363	367
SMV-548	277	289	316	316	260	288	363	367
SMV-549	309	309	316	324	288	292	343	367
SMV-550	277	309	316	324	288	292	367	367
SMV-551	277	289	316	316	260	288	343	363
SMV-552	277	309	0	0	260	288	367	367
SMV-553	289	325	316	324	288	292	0	0
SMV-554	277	309	0	0	288	292	367	367
SMV-555	289	325	316	324	288	292	343	367
SMV-556	289	325	316	324	288	292	367	367
SMV-557	289	325	316	324	288	292	0	0
SMV-558	277	309	316	316	288	292	343	363
SMV-559	277	309	316	324	288	292	367	367
SMV-565	277	305	316	316	296	300	359	363
SMV-566	277	305	316	324	260	304	363	367
SMV-567	309	325	316	316	260	296	363	367
SMV-568	277	325	316	324	296	300	359	363
SMV-569	305	309	316	316	260	296	359	363
SMV-570	277	305	316	336	260	304	359	363
SMV-571	277	305	316	324	300	304	359	363
SMV-572	305	305	324	336	280	284	347	359
SMV-573	277	305	316	368	280	296	359	367
SMV-574	305	305	316	324	280	296	363	367
SMV-575	305	305	324	336	280	284	359	367
SMV-576	277	305	316	324	280	296	363	367
SMV-577	277	305	316	372	280	284	359	367
SMV-578	0	0	316	324	280	296	347	363
SMV-580	305	309	324	336	280	284	347	359
SMV-581	277	309	336	368	280	296	347	363
SMV-582	0	0	336	368	280	284	347	347
SMV-583	305	309	316	368	280	296	347	359
SMV-584	0	0	336	368	280	296	363	363
SMV-585	305	305	324	336	280	284	347	359
SMV-586	0	0	336	368	280	296	363	367
SMV-587	305	305	316	368	280	296	347	363
SMV-588	305	305	336	368	280	284	347	363
SMV-589	277	309	316	324	280	296	347	363
SMV-591	305	305	336	368	280	296	363	367
SMV-610	0	0	312	324	288	300	375	375
SMV-612	305	305	312	320	280	304	363	375
SMV-614	289	309	320	324	280	288	363	375
SMV-618	0	0	320	320	288	300	363	375
SMV-619	0	0	320	320	300	300	375	375
SMV-625	0	0	320	324	280	288	363	375
SMV-629	305	309	320	320	300	304	363	375
smv-787	321	329	316	316	296	300	363	371
smv-788	321	329	316	316	296	300	363	379
smv-789	321	329	320	336	296	300	363	371
smv-790	0	0	316	320	288	296	363	379
smv-791	321	329	320	336	288	296	359	371
smv-798	0	0	316	316	296	300	359	371
smv-805	313	329	316	336	296	300	363	379
smv-806	309	309	324	336	276	288	359	363
smv-807	309	333	312	324	276	288	359	363
smv-808	285	333	312	324	276	280	363	367
smv-810	285	333	0	0	276	280	359	359
smv-811	309	309	312	328	276	280	359	363
smv-815	285	333	0	0	276	280	359	363
smv-817	309	333	0	0	276	280	359	363
smv-818	309	309	312	328	276	280	0	0
smv-819	309	333	0	0	276	288	363	363
smv-820	309	333	328	336	276	280	359	363
smv-823	285	333	324	336	276	288	363	367
smv-825	309	333	312	324	276	288	359	363
smv-989	289	309	316	336	276	288	367	379
smv-990	309	329	336	336	288	308	359	375
smv-991	289	293	316	336	288	308	367	379
smv-992	329	329	336	336	276	308	359	359
smv-993	0	0	336	336	276	276	367	367
smv-995	309	329	336	336	276	288	367	367
smv-834	301	309	316	324	280	308	367	379
smv-835	289	301	316	320	292	308	367	367
smv-836	309	313	320	340	292	308	367	367
smv-837	301	309	320	340	292	308	367	379
smv-838	301	309	324	340	280	296	0	0
smv-839	301	309	316	324	292	296	367	379
smv-840	289	313	0	0	292	296	367	367
smv-841	289	313	0	0	292	296	367	379
smv-842	289	301	316	320	280	296	367	379
smv-844	289	301	316	324	292	308	367	367
smv-846	289	313	0	0	280	296	367	379
smv-847	309	313	324	340	280	308	367	379
smv-848	309	313	324	340	292	296	367	367
smv-849	309	313	324	340	280	308	367	367
smv-850	301	309	316	324	292	296	367	379
smv-851	289	313	316	320	292	296	367	367
smv-852	289	313	316	324	292	308	367	379
smv-853	0	0	324	340	292	296	367	379
smv-854	277	333	312	328	296	300	363	375
smv-855	277	277	312	328	296	300	371	375
smv-856	277	305	312	332	276	304	371	375
smv-857	277	333	320	332	300	304	351	371
smv-858	277	333	312	328	276	304	363	375
smv-859	277	333	0	0	276	304	371	375
smv-860	277	333	312	332	296	300	371	375
smv-861	277	305	312	332	296	300	371	375
smv-862	305	333	320	332	296	300	351	371
smv-863	277	333	312	328	276	296	363	375
smv-865	305	333	320	328	276	296	351	371
smv-866	277	305	320	328	300	304	351	371
smv-868	277	333	0	0	276	304	371	375
smv-869	277	305	312	328	276	304	371	375
smv-870	277	305	312	328	276	304	351	371
smv-871	277	277	312	332	300	304	351	363
smv-872	305	333	320	328	296	300	351	363
smv-873	305	333	320	328	276	304	351	363
smv-923	305	333	316	324	280	300	363	367
smv-924	305	333	316	324	280	300	363	367
smv-926	305	333	316	324	280	288	367	367
smv-925	305	305	0	0	292	300	367	367
smv-927	305	305	316	324	280	300	363	367
smv-951	289	313	312	320	292	300	343	363
smv-952	0	0	332	332	292	300	343	363
smv-953	0	0	312	320	288	300	363	363
smv-826	317	325	316	324	268	276	359	363
smv-827	317	325	316	324	268	296	359	363
smv-828	297	325	324	340	268	296	363	367
smv-832	297	309	316	324	276	300	363	367
smv-833	309	317	324	340	276	300	359	363
smv-966	309	309	336	336	296	300	359	363
smv-968	289	309	320	336	276	296	359	363
smv-969	309	309	336	336	276	288	367	367
smv-970	289	309	0	0	276	296	367	367
smv-971	289	309	0	0	296	300	359	363
smv-972	289	309	336	336	288	300	363	367
smv-973	289	289	320	336	276	296	367	367
smv-974	289	309	320	336	288	300	363	367
smv-976	309	309	320	336	276	296	359	363
smv-978	289	289	320	336	296	300	359	363
smv-979	289	309	336	336	276	288	359	367
smv-980	289	309	320	336	276	296	359	363
smv-981	309	309	320	336	296	300	359	363
smv-982	289	309	320	336	276	288	359	367
smv-984	289	309	320	336	276	296	359	363
smv-985	289	309	336	336	276	296	367	367
smv-1000	305	309	316	336	276	288	359	367
smv-1001	305	309	0	0	276	288	359	363
smv-1002	305	305	0	0	276	288	359	363
smv-1004	309	321	0	0	276	296	359	367
smv-1005	305	321	316	336	276	296	359	367
smv-2187	325	329	320	324	288	304	367	371
smv-2188	325	329	316	324	260	296	371	375
smv-2189	289	325	312	316	260	304	371	375
smv-2190	289	309	312	316	288	304	363	375
smv-2191	325	329	312	320	260	296	367	371
smv-2192	289	325	312	316	292	304	367	371
smv-2193	289	325	312	316	260	296	363	375
smv-2194	289	309	320	324	288	304	363	375
smv-2197	309	329	312	320	288	296	371	375
smv-2198	289	325	316	324	260	304	367	371
smv-2199	289	325	312	316	0	0	367	371
smv-2201	309	329	312	316	288	304	363	375
smv-2204	289	325	320	324	0	0	363	367
smv-2207	273	309	304	324	284	308	343	367
smv-2208	273	309	304	316	276	284	343	367
smv-2209	273	325	304	324	280	308	347	363
smv-2210	273	309	304	324	280	308	347	367
smv-2211	273	325	304	316	276	280	343	367
smv-2212	273	325	304	316	284	308	343	367
smv-2213	273	309	304	316	276	284	343	367
smv-2214	273	309	304	324	284	308	347	367
smv-2215	273	309	304	324	276	284	343	367
smv-2216	273	309	304	316	284	308	347	367
smv-2217	273	309	304	324	276	280	343	363
smv-2218	273	309	304	316	276	280	347	367
smv-2219	273	309	304	316	284	308	343	363
smv-2220	273	309	304	324	280	308	343	367
smv-2221	273	325	304	324	280	308	347	367
smv-2222	273	325	304	324	276	280	343	363
smv-2223	273	309	304	316	276	284	347	363
smv-2224	273	309	304	324	276	280	343	363
smv-2225	273	325	304	324	280	308	347	363
smv-2226	273	309	304	324	280	308	343	363
smv-2236	325	329	324	324	296	300	359	363
smv-2237	293	325	320	320	296	300	371	383
smv-2238	325	329	320	324	288	288	359	371
smv-2239	309	329	320	320	296	300	359	371
smv-2240	293	325	320	324	288	296	359	363
smv-2241	293	325	324	324	288	296	359	371
smv-2242	293	309	320	324	296	300	371	383
smv-2243	293	309	320	320	288	296	363	383
smv-2244	325	329	0	0	296	300	359	363
smv-2245	309	329	320	320	296	300	371	383
smv-2246	325	329	320	324	288	296	371	383
smv-2247	293	325	320	320	288	300	371	383
smv-2248	325	329	320	320	288	288	363	383
smv-2249	293	309	320	320	288	296	371	383
smv-2250	293	325	320	320	296	300	359	363
smv-2251	325	329	324	324	288	296	363	383
smv-2252	293	325	324	324	288	296	371	383
smv-2253	293	325	320	320	296	300	359	363
smv-2254	293	325	320	324	288	296	359	363
smv-2255	293	309	324	324	288	300	363	383
smv-2256	309	325	312	316	284	292	363	363
smv-2257	309	325	312	312	280	292	363	363
smv-2258	309	325	312	316	284	292	363	363
smv-2259	313	325	316	316	280	292	363	363
smv-2260	313	325	312	312	280	292	363	367
smv-2261	309	325	312	316	284	292	363	367
smv-2262	289	313	312	316	284	292	363	367
smv-2263	309	325	316	316	280	292	363	367
smv-2264	289	309	312	316	284	292	363	363
smv-2265	289	309	312	316	280	292	363	367
smv-2266	309	325	312	316	284	292	363	363
smv-2267	313	325	312	316	284	292	363	363
smv-2268	309	325	312	316	280	292	363	367
smv-2269	289	309	312	312	284	292	363	367
smv-2270	289	313	312	316	284	292	363	363
smv-2271	313	325	316	316	284	292	363	367
smv-2272	313	325	312	316	280	292	363	363
smv-2273	289	313	312	312	284	292	363	367
smv-2274	289	309	312	316	284	292	363	367
smv-2275	309	325	312	316	284	292	363	363
smv-1032	305	317	316	324	288	300	363	367
smv-1033	277	305	324	336	288	300	363	367
smv-1034	277	305	324	336	288	300	363	367
smv-1035	277	305	324	336	300	300	0	0
smv-1037	305	317	316	320	300	300	0	0
smv-1038	277	301	316	324	280	288	367	379
smv-1039	305	317	316	324	288	300	367	379
smv-1040	277	301	0	0	280	288	363	367
smv-1042	277	305	316	324	280	300	367	379
smv-1043	277	301	0	0	300	300	367	367
smv-1044	277	301	316	320	300	300	363	367
smv-1045	277	301	324	336	280	300	363	367
smv-1046	301	317	0	0	288	300	363	367
smv-1047	301	317	316	320	280	288	367	379
smv-1048	277	301	316	324	280	300	363	367
smv-1049	277	301	324	336	288	300	367	379
smv-1050	301	317	316	320	288	300	363	367
smv-1051	277	305	316	320	300	300	367	379

## Sheet: Female Genotype data
Female	CC1G03-1	CC1G03-2	CC1F01-1	CC1F01-2	CC1G02-1	CC1G02-2	CCP7D04-1	CCP7D04-2
SMV138	289	329	316	316	300	304	359	363
SMV139	309	309	316	336	296	300	359	367
SMV140	305	309	312	316	280	308	347	367
SMV141	301	305	320	324	288	300	367	367
SMV144	305	329	328	336	292	300	359	359
SMV145	325	329	336	344	288	292	343	363
SMV146	305	305	320	324	288	288	363	367
SMV147	305	313	312	316	296	300	367	367
SMV154	277	305	316	336	260	280	363	367
SMV155	309	333	320	320	268	308	351	359
SMV157	309	313	316	324	288	292	367	371
SMV159	309	329	312	312	260	276	359	367
SMV160	305	309	316	348	284	304	363	367
SMV161	309	325	316	316	288	292	367	367
SMV164	289	305	312	324	292	296	363	363
SMV165	301	309	320	324	288	292	367	371
SMV167	313	329	320	324	276	304	359	399
SMV189	313	333	316	324	288	300	363	367
SMV206	305	309	316	332	288	304	343	343
SMV209	297	313	320	324	276	288	371	379
SMV216	277	305	316	324	268	296	343	359
SMV217	305	321	312	324	288	300	363	367
SMV218	305	309	316	324	268	296	359	367
SMV220	305	309	316	336	268	300	359	363
SMV221	289	309	316	316	260	292	363	367
SMV222	305	325	316	324	260	300	359	367
SMV224	305	309	316	336	280	280	0	0
SMV228	305	309	320	324	280	300	0	0
SMV141	301	305	320	324	288	300	367	367
SMV690	329	329	316	336	288	300	371	379
SMV692	309	333	312	336	276	276	359	363
SMV696	289	329	336	336	276	288	359	367
SMV697	301	313	316	340	280	292	367	367
SMV699	277	333	312	320	276	300	351	375
SMV701	289	305	316	316	288	300	343	367
SMV702	289	309	320	332	288	292	363	371
SMV706	297	317	316	340	268	300	363	367
SMV707	289	309	336	336	288	296	363	367
SMV711	305	309	316	324	276	276	363	367
SMV728	289	329	312	324	296	304	363	371
SMV737	309	325	316	324	276	308	363	367
SMV742	293	329	320	324	288	300	359	383
SMV743	309	313	312	316	292	292	363	367

## Sheet: Known Maternity data
MotherID	OffspringID1	OffspringID2	OffspringID3	OffspringID4	OffspringID5	OffspringID6	OffspringID7	OffspringID8	OffspringID9	OffspringID10	OffspringID11	OffspringID12	OffspringID13	OffspringID14	OffspringID15	OffspringID16	OffspringID17	OffspringID18	OffspringID19	OffspringID20
SMV138	CC18	CC19	CC20	CC21	CC23	CC25	CC26	CC27	CC28	CC29	CC30	CC31	CC32	CC34	CC36
SMV139	B9	B8	B12	B13	B14	B16
SMV140	A8	A9	A11	A12	A13	A14	A15	A16	A17	A18	A19	A20	A21	A22	A23	A24	A25	A26	A27
SMV141	E25	E26	E27	E28	E29	E30	E32	E33	E34	E35	E36	E37	E38	E39	E40
SMV144	I5	I6	I8	I9	I15	I16	I17	I18
SMV145	C5	C4	C8	C10	C21	C22	C23
SMV146	J22	J23	J24	J25	J26	J27	J28	J29	J30	J31	J32	J33	J34	J35
SMV147	F8	F9	F10	F16	F17
SMV154	O25	O27	O28	O29	O20	O22	O24
SMV155	P3	P22	P23	P15	P16	P18	P21
SMV157	R18	R19	R20	R21	R22
SMV159	T2	T3	T4	T5	T6	T9	T10
SMV160	U25	U26	U27	U29	U30	U31	U32	U33	U34	U35	U36	U37
SMV161	X13	X14	X15	X16	X17	X18	X19	X20	X21	X22	X24	X25
SMV164	V28	V29	V30	V31	V32	V33	V34	V35	V37	V38	V39	V40	V41	V42	V43	V44	V45	V46
SMV165	Y20	Y21	Y22	Y23	Y24	Y25	Y26	Y27	Y28	Y30	Y31	Y32
SMV167	Z13	Z14	Z16	Z18	Z21	Z22	Z23	Z24	Z25	Z26	Z28	Z29	Z30	Z31	Z32
SMV189	SMV-337	SMV-338	SMV-339	SMV-340	SMV-341	SMV-342	SMV-343	SMV-345	SMV-346	SMV-347	SMV-348	SMV-349	SMV-351	SMV-352	SMV-353	SMV-355	SMV-356
SMV206	SMV-405	SMV-406	SMV-409	SMV-420	SMV-417
SMV209	SMV-425	SMV-426	SMV-427	SMV-428	SMV-429	SMV-431	SMV-432	SMV-433	SMV-434	SMV-436	SMV-437	SMV-438	SMV-439	SMV-441	SMV-442
SMV216	SMV-443	SMV-444	SMV-445	SMV-446	SMV-447	SMV-448	SMV-449	SMV-450	SMV-451	SMV-452	SMV-453	SMV-454	SMV-455	SMV-456	SMV-457	SMV-458	SMV-459	SMV-460	SMV-461	SMV-462
SMV217	SMV-468	SMV-469	SMV-470	SMV-471	SMV-472	SMV-473	SMV-474	SMV-475	SMV-476	SMV-477	SMV-478	SMV-479	SMV-480	SMV-481	SMV-482	SMV-483	SMV-484	SMV-485	SMV-486	SMV-487
SMV218	SMV-488	SMV-489	SMV-490	SMV-491	SMV-492	SMV-493	SMV-494	SMV-495	SMV-496	SMV-497	SMV-498	SMV-499	SMV-500	SMV-502	SMV-503	SMV-505	SMV-507
SMV220	SMV-510	SMV-511	SMV-512	SMV-513	SMV-514	SMV-515	SMV-516	SMV-517	SMV-518	SMV-519	SMV-520	SMV-521	SMV-522	SMV-523	SMV-524	SMV-525	SMV-526	SMV-527	SMV-528	SMV-529
SMV221	SMV-540	SMV-542	SMV-543	SMV-545	SMV-546	SMV-547	SMV-548	SMV-549	SMV-550	SMV-551	SMV-552	SMV-553	SMV-554	SMV-555	SMV-556	SMV-557	SMV-558	SMV-559
SMV222	SMV-565	SMV-566	SMV-567	SMV-568	SMV-569	SMV-570	SMV-571
SMV224	SMV-572	SMV-573	SMV-574	SMV-575	SMV-576	SMV-577	SMV-578	SMV-580	SMV-581	SMV-582	SMV-583	SMV-584	SMV-585	SMV-586	SMV-587	SMV-588	SMV-589	SMV-591
SMV228	SMV-610	SMV-612	SMV-614	SMV-618	SMV-619	SMV-625	SMV-629
SMV141	smv-1032	smv-1033	smv-1034	smv-1035	smv-1037	smv-1038	smv-1039	smv-1040	smv-1042	smv-1043	smv-1044	smv-1045	smv-1046	smv-1047	smv-1048	smv-1049	smv-1050	smv-1051
SMV690	smv-787	smv-788	smv-789	smv-790	smv-791	smv-798	smv-805
SMV692	smv-806	smv-807	smv-808	smv-810	smv-811	smv-815	smv-817	smv-818	smv-819	smv-820	smv-823	smv-825
SMV696	smv-989	smv-990	smv-991	smv-992	smv-993	smv-995
SMV697	smv-834	smv-835	smv-836	smv-837	smv-838	smv-839	smv-840	smv-841	smv-842	smv-844	smv-846	smv-847	smv-848	smv-849	smv-850	smv-851	smv-852	smv-853
SMV699	smv-854	smv-855	smv-856	smv-857	smv-858	smv-859	smv-860	smv-861	smv-862	smv-863	smv-865	smv-866	smv-868	smv-869	smv-870	smv-871	smv-872	smv-873
SMV701	smv-923	smv-924	smv-926	smv-925	smv-927
SMV702	smv-951	smv-953	smv-952
SMV706	smv-826	smv-827	smv-828	smv-832	smv-833
SMV707	smv-966	smv-968	smv-969	smv-970	smv-971	smv-972	smv-973	smv-974	smv-976	smv-978	smv-979	smv-980	smv-981	smv-982	smv-984	smv-985
SMV711	smv-1000	smv-1001	smv-1004	smv-1002	smv-1005
SMV728	smv-2187	smv-2188	smv-2189	smv-2190	smv-2191	smv-2192	smv-2193	smv-2194	smv-2197	smv-2198	smv-2199	smv-2201	smv-2204
SMV737	smv-2207	smv-2208	smv-2209	smv-2210	smv-2211	smv-2212	smv-2213	smv-2214	smv-2215	smv-2216	smv-2217	smv-2218	smv-2219	smv-2220	smv-2221	smv-2222	smv-2223	smv-2224	smv-2225	smv-2226
SMV742	smv-2236	smv-2237	smv-2238	smv-2239	smv-2240	smv-2241	smv-2242	smv-2243	smv-2244	smv-2245	smv-2246	smv-2247	smv-2248	smv-2249	smv-2250	smv-2251	smv-2252	smv-2253	smv-2254	smv-2255
SMV743	smv-2256	smv-2257	smv-2258	smv-2259	smv-2260	smv-2261	smv-2262	smv-2263	smv-2264	smv-2265	smv-2266	smv-2267	smv-2268	smv-2269	smv-2270	smv-2271	smv-2272	smv-2273	smv-2274	smv-2275

## Sheet: COLONY Parameters
Mating System - I	Female Polygamy and Male Polygamy
Mating System - II	With Inbreeding and With Clone
Species	Dioecious and Diploid
Length of Run	Medium
Analysis Method	Full-Likelihood (FL)
Likelihood Precision	High
Run Specifications	No Update; Yes to Sibship Scaling; One run; 100 to Random Number Seed.
Sibship Prior	Weak Prior; 1,0; 1,0.
Number of loci	4
Number of offspring	534
Number of male candidates	0
Number of female candidates	43
Number of known paternal sibships	0
Number of known maternal sibships	43
Number of offspring with excluded fathers	0
Number of offspring with excluded mothers	534

## Sheet: Result Data
Offspring	Father ID	Mother ID
CC18	*1	SMV138
CC19	*1	SMV138
CC20	*1	SMV138
CC21	*1	SMV138
CC23	*1	SMV138
CC25	*1	SMV138
CC26	*1	SMV138
CC27	*1	SMV138
CC28	*1	SMV138
CC29	*1	SMV138
CC30	*1	SMV138
CC31	*1	SMV138
CC32	*1	SMV138
CC34	*1	SMV138
CC36	*1	SMV138
B9	*2	SMV139
B8	*2	SMV139
B12	*2	SMV139
B13	*2	SMV139
B14	*3	SMV139
B16	*2	SMV139
A8	*4	SMV140
A9	*4	SMV140
A11	*4	SMV140
A12	*4	SMV140
A13	*4	SMV140
A14	*4	SMV140
A15	*4	SMV140
A16	*4	SMV140
A17	*4	SMV140
A18	*4	SMV140
A19	*4	SMV140
A20	*4	SMV140
A21	*4	SMV140
A22	*4	SMV140
A23	*4	SMV140
A24	*4	SMV140
A25	*4	SMV140
A26	*4	SMV140
A27	*4	SMV140
E25	*5	SMV141
E26	*5	SMV141
E27	*5	SMV141
E28	*5	SMV141
E29	*6	SMV141
E30	*5	SMV141
E32	*7	SMV141
E33	*5	SMV141
E34	*5	SMV141
E35	*5	SMV141
E36	*5	SMV141
E37	*5	SMV141
E38	*5	SMV141
E39	*5	SMV141
E40	*5	SMV141
I5	*8	SMV144
I6	*9	SMV144
I8	*9	SMV144
I9	*10	SMV144
I15	*11	SMV144
I16	*12	SMV144
I17	*13	SMV144
I18	*10	SMV144
C5	*14	SMV145
C4	*15	SMV145
C8	*16	SMV145
C10	*14	SMV145
C21	*14	SMV145
C22	*14	SMV145
C23	*14	SMV145
J22	*17	SMV146
J23	*17	SMV146
J24	*17	SMV146
J25	*17	SMV146
J26	*17	SMV146
J27	*17	SMV146
J28	*17	SMV146
J29	*17	SMV146
J30	*17	SMV146
J31	*17	SMV146
J32	*17	SMV146
J33	*17	SMV146
J34	*17	SMV146
J35	*17	SMV146
F8	*18	SMV147
F9	*19	SMV147
F10	*8	SMV147
F16	*18	SMV147
F17	*18	SMV147
O25	*20	SMV154
O27	*21	SMV154
O28	*20	SMV154
O29	*20	SMV154
O20	*20	SMV154
O22	*22	SMV154
O24	*20	SMV154
P3	*3	SMV155
P22	*3	SMV155
P23	*3	SMV155
P15	*23	SMV155
P16	*24	SMV155
P18	*3	SMV155
P21	*23	SMV155
R18	*25	SMV157
R19	*26	SMV157
R20	*26	SMV157
R21	*25	SMV157
R22	*25	SMV157
T2	*27	SMV159
T3	*27	SMV159
T4	*28	SMV159
T5	*21	SMV159
T6	*21	SMV159
T9	*27	SMV159
T10	*27	SMV159
U25	*22	SMV160
U26	*22	SMV160
U27	*22	SMV160
U29	*29	SMV160
U30	*22	SMV160
U31	*22	SMV160
U32	*22	SMV160
U33	*22	SMV160
U34	*22	SMV160
U35	*28	SMV160
U36	*22	SMV160
U37	*22	SMV160
X13	*30	SMV161
X14	*30	SMV161
X15	*30	SMV161
X16	*30	SMV161
X17	*30	SMV161
X18	*30	SMV161
X19	*30	SMV161
X20	*31	SMV161
X21	*30	SMV161
X22	*32	SMV161
X24	*30	SMV161
X25	*30	SMV161
V28	*33	SMV164
V29	*33	SMV164
V30	*33	SMV164
V31	*33	SMV164
V32	*33	SMV164
V33	*33	SMV164
V34	*33	SMV164
V35	*33	SMV164
V37	*33	SMV164
V38	*33	SMV164
V39	*33	SMV164
V40	*33	SMV164
V41	*33	SMV164
V42	*33	SMV164
V43	*33	SMV164
V44	*33	SMV164
V45	*33	SMV164
V46	*33	SMV164
Y20	*34	SMV165
Y21	*1	SMV165
Y22	*1	SMV165
Y23	*34	SMV165
Y24	*35	SMV165
Y25	*34	SMV165
Y26	*34	SMV165
Y27	*36	SMV165
Y28	*37	SMV165
Y30	*34	SMV165
Y31	*34	SMV165
Y32	*34	SMV165
Z13	*38	SMV167
Z14	*38	SMV167
Z16	*38	SMV167
Z18	*38	SMV167
Z21	*38	SMV167
Z22	*38	SMV167
Z23	*1	SMV167
Z24	*38	SMV167
Z25	*38	SMV167
Z26	*38	SMV167
Z28	*38	SMV167
Z29	*38	SMV167
Z30	*38	SMV167
Z31	*38	SMV167
Z32	*38	SMV167
SMV-337	*39	SMV189
SMV-338	*39	SMV189
SMV-339	*39	SMV189
SMV-340	*39	SMV189
SMV-341	*39	SMV189
SMV-342	*39	SMV189
SMV-343	*39	SMV189
SMV-345	*39	SMV189
SMV-346	*39	SMV189
SMV-347	*39	SMV189
SMV-348	*40	SMV189
SMV-349	*39	SMV189
SMV-351	*39	SMV189
SMV-352	*39	SMV189
SMV-353	*39	SMV189
SMV-355	*39	SMV189
SMV-356	*39	SMV189
SMV-405	*41	SMV206
SMV-406	*41	SMV206
SMV-409	*41	SMV206
SMV-417	*42	SMV206
SMV-420	*41	SMV206
SMV-425	*43	SMV209
SMV-426	*43	SMV209
SMV-427	*44	SMV209
SMV-428	*43	SMV209
SMV-429	*45	SMV209
SMV-431	*43	SMV209
SMV-432	*43	SMV209
SMV-433	*44	SMV209
SMV-434	*44	SMV209
SMV-436	*43	SMV209
SMV-437	*43	SMV209
SMV-438	*43	SMV209
SMV-439	*43	SMV209
SMV-441	*43	SMV209
SMV-442	*44	SMV209
SMV-443	*46	SMV216
SMV-444	*46	SMV216
SMV-445	*25	SMV216
SMV-446	*46	SMV216
SMV-447	*46	SMV216
SMV-448	*25	SMV216
SMV-449	*46	SMV216
SMV-450	*46	SMV216
SMV-451	*46	SMV216
SMV-452	*25	SMV216
SMV-453	*46	SMV216
SMV-454	*46	SMV216
SMV-455	*46	SMV216
SMV-456	*46	SMV216
SMV-457	*46	SMV216
SMV-458	*47	SMV216
SMV-459	*46	SMV216
SMV-460	*46	SMV216
SMV-461	*46	SMV216
SMV-462	*46	SMV216
SMV-468	*48	SMV217
SMV-469	*48	SMV217
SMV-470	*48	SMV217
SMV-471	*48	SMV217
SMV-472	*48	SMV217
SMV-473	*48	SMV217
SMV-474	*48	SMV217
SMV-475	*48	SMV217
SMV-476	*48	SMV217
SMV-477	*48	SMV217
SMV-478	*48	SMV217
SMV-479	*48	SMV217
SMV-480	*48	SMV217
SMV-481	*48	SMV217
SMV-482	*48	SMV217
SMV-483	*48	SMV217
SMV-484	*48	SMV217
SMV-485	*48	SMV217
SMV-486	*48	SMV217
SMV-487	*48	SMV217
SMV-488	*49	SMV218
SMV-489	*49	SMV218
SMV-490	*49	SMV218
SMV-491	*49	SMV218
SMV-492	*49	SMV218
SMV-493	*49	SMV218
SMV-494	*49	SMV218
SMV-495	*49	SMV218
SMV-496	*49	SMV218
SMV-497	*49	SMV218
SMV-498	*49	SMV218
SMV-499	*49	SMV218
SMV-500	*49	SMV218
SMV-502	*49	SMV218
SMV-503	*49	SMV218
SMV-505	*49	SMV218
SMV-507	*49	SMV218
SMV-510	*50	SMV220
SMV-511	*50	SMV220
SMV-512	*50	SMV220
SMV-513	*50	SMV220
SMV-514	*50	SMV220
SMV-515	*50	SMV220
SMV-516	*25	SMV220
SMV-517	*50	SMV220
SMV-518	*50	SMV220
SMV-519	*50	SMV220
SMV-520	*25	SMV220
SMV-521	*50	SMV220
SMV-522	*50	SMV220
SMV-523	*50	SMV220
SMV-524	*50	SMV220
SMV-525	*50	SMV220
SMV-526	*50	SMV220
SMV-527	*50	SMV220
SMV-528	*50	SMV220
SMV-529	*50	SMV220
SMV-540	*51	SMV221
SMV-542	*51	SMV221
SMV-543	*51	SMV221
SMV-545	*51	SMV221
SMV-546	*51	SMV221
SMV-547	*51	SMV221
SMV-548	*51	SMV221
SMV-549	*52	SMV221
SMV-550	*51	SMV221
SMV-551	*51	SMV221
SMV-552	*51	SMV221
SMV-553	*51	SMV221
SMV-554	*51	SMV221
SMV-555	*51	SMV221
SMV-556	*51	SMV221
SMV-557	*51	SMV221
SMV-558	*51	SMV221
SMV-559	*51	SMV221
SMV-565	*53	SMV222
SMV-566	*54	SMV222
SMV-567	*53	SMV222
SMV-568	*53	SMV222
SMV-569	*53	SMV222
SMV-570	*54	SMV222
SMV-571	*54	SMV222
SMV-572	*55	SMV224
SMV-573	*55	SMV224
SMV-574	*55	SMV224
SMV-575	*55	SMV224
SMV-576	*55	SMV224
SMV-577	*56	SMV224
SMV-578	*55	SMV224
SMV-580	*55	SMV224
SMV-581	*55	SMV224
SMV-582	*55	SMV224
SMV-583	*55	SMV224
SMV-584	*57	SMV224
SMV-585	*55	SMV224
SMV-586	*55	SMV224
SMV-587	*55	SMV224
SMV-588	*55	SMV224
SMV-589	*55	SMV224
SMV-591	*55	SMV224
SMV-610	*58	SMV228
SMV-612	*59	SMV228
SMV-614	*17	SMV228
SMV-618	*60	SMV228
SMV-619	*61	SMV228
SMV-625	*62	SMV228
SMV-629	*59	SMV228
smv-787	*63	SMV690
smv-788	*63	SMV690
smv-789	*63	SMV690
smv-790	*63	SMV690
smv-791	*63	SMV690
smv-798	*63	SMV690
smv-805	*64	SMV690
smv-806	*8	SMV692
smv-807	*8	SMV692
smv-808	*65	SMV692
smv-810	*65	SMV692
smv-811	*7	SMV692
smv-815	*65	SMV692
smv-817	*7	SMV692
smv-818	*7	SMV692
smv-819	*11	SMV692
smv-820	*7	SMV692
smv-823	*65	SMV692
smv-825	*8	SMV692
smv-989	*66	SMV696
smv-990	*3	SMV696
smv-991	*67	SMV696
smv-992	*68	SMV696
smv-993	*69	SMV696
smv-995	*69	SMV696
smv-834	*70	SMV697
smv-835	*70	SMV697
smv-836	*70	SMV697
smv-837	*70	SMV697
smv-838	*70	SMV697
smv-839	*70	SMV697
smv-840	*70	SMV697
smv-841	*70	SMV697
smv-842	*70	SMV697
smv-844	*70	SMV697
smv-846	*70	SMV697
smv-847	*70	SMV697
smv-848	*70	SMV697
smv-849	*70	SMV697
smv-850	*70	SMV697
smv-851	*70	SMV697
smv-852	*70	SMV697
smv-853	*70	SMV697
smv-854	*71	SMV699
smv-855	*71	SMV699
smv-856	*71	SMV699
smv-857	*71	SMV699
smv-858	*71	SMV699
smv-859	*71	SMV699
smv-860	*71	SMV699
smv-861	*71	SMV699
smv-862	*71	SMV699
smv-863	*71	SMV699
smv-865	*71	SMV699
smv-866	*71	SMV699
smv-868	*71	SMV699
smv-869	*71	SMV699
smv-870	*71	SMV699
smv-871	*71	SMV699
smv-872	*71	SMV699
smv-873	*71	SMV699
smv-923	*72	SMV701
smv-924	*72	SMV701
smv-926	*72	SMV701
smv-925	*73	SMV701
smv-927	*74	SMV701
smv-951	*75	SMV702
smv-952	*41	SMV702
smv-953	*76	SMV702
smv-826	*35	SMV706
smv-827	*35	SMV706
smv-828	*35	SMV706
smv-832	*35	SMV706
smv-833	*35	SMV706
smv-966	*77	SMV707
smv-968	*77	SMV707
smv-969	*77	SMV707
smv-970	*77	SMV707
smv-971	*77	SMV707
smv-972	*77	SMV707
smv-973	*77	SMV707
smv-974	*77	SMV707
smv-976	*77	SMV707
smv-978	*77	SMV707
smv-979	*77	SMV707
smv-980	*77	SMV707
smv-981	*77	SMV707
smv-982	*77	SMV707
smv-984	*77	SMV707
smv-985	*77	SMV707
smv-1000	*78	SMV711
smv-1001	*78	SMV711
smv-1002	*78	SMV711
smv-1004	*79	SMV711
smv-1005	*79	SMV711
smv-2187	*80	SMV728
smv-2188	*80	SMV728
smv-2189	*80	SMV728
smv-2190	*80	SMV728
smv-2191	*80	SMV728
smv-2192	*81	SMV728
smv-2193	*80	SMV728
smv-2194	*80	SMV728
smv-2197	*80	SMV728
smv-2198	*80	SMV728
smv-2199	*80	SMV728
smv-2201	*80	SMV728
smv-2204	*80	SMV728
smv-2207	*82	SMV737
smv-2208	*82	SMV737
smv-2209	*82	SMV737
smv-2210	*82	SMV737
smv-2211	*82	SMV737
smv-2212	*82	SMV737
smv-2213	*82	SMV737
smv-2214	*82	SMV737
smv-2215	*82	SMV737
smv-2216	*82	SMV737
smv-2217	*82	SMV737
smv-2218	*82	SMV737
smv-2219	*82	SMV737
smv-2220	*82	SMV737
smv-2221	*82	SMV737
smv-2222	*82	SMV737
smv-2223	*82	SMV737
smv-2224	*82	SMV737
smv-2225	*82	SMV737
smv-2226	*82	SMV737
smv-2236	*83	SMV742
smv-2237	*83	SMV742
smv-2238	*83	SMV742
smv-2239	*83	SMV742
smv-2240	*83	SMV742
smv-2241	*83	SMV742
smv-2242	*83	SMV742
smv-2243	*83	SMV742
smv-2244	*83	SMV742
smv-2245	*83	SMV742
smv-2246	*83	SMV742
smv-2247	*83	SMV742
smv-2248	*83	SMV742
smv-2249	*83	SMV742
smv-2250	*83	SMV742
smv-2251	*83	SMV742
smv-2252	*83	SMV742
smv-2253	*83	SMV742
smv-2254	*83	SMV742
smv-2255	*84	SMV742
smv-2256	*85	SMV743
smv-2257	*85	SMV743
smv-2258	*85	SMV743
smv-2259	*85	SMV743
smv-2260	*85	SMV743
smv-2261	*85	SMV743
smv-2262	*85	SMV743
smv-2263	*85	SMV743
smv-2264	*85	SMV743
smv-2265	*85	SMV743
smv-2266	*85	SMV743
smv-2267	*85	SMV743
smv-2268	*85	SMV743
smv-2269	*85	SMV743
smv-2270	*85	SMV743
smv-2271	*85	SMV743
smv-2272	*85	SMV743
smv-2273	*85	SMV743
smv-2274	*85	SMV743
smv-2275	*85	SMV743
smv-1032	*86	SMV141
smv-1033	*21	SMV141
smv-1034	*21	SMV141
smv-1035	*21	SMV141
smv-1037	*86	SMV141
smv-1038	*86	SMV141
smv-1039	*86	SMV141
smv-1040	*87	SMV141
smv-1042	*86	SMV141
smv-1043	*88	SMV141
smv-1044	*86	SMV141
smv-1045	*87	SMV141
smv-1046	*86	SMV141
smv-1047	*86	SMV141
smv-1048	*86	SMV141
smv-1049	*21	SMV141
smv-1050	*86	SMV141
smv-1051	*86	SMV141
