# Supplementary material for: Reproductive strategies in loggerhead sea turtle Caretta caretta: polyandry and polygyny in a Southwest Atlantic rookery
Source: PeerJ journal article supplement (doi:10.7717/peerj.18714), 2025-01-07
Supplement: TableS2.pdf [file TableS2.pdf]

**Table S2.** Information from loggerhead turtle males that contributed to more than one nest within or between the three breeding seasons sampled. Underlined indicates the seven males that exhibited polygyny.

| ID Male     | Season  | ID Female/Nest |
|-------------|---------|----------------|
| <u>*♂1</u>  | 2017/18 | SMV138         |
|             | 2017/18 | SMV165         |
|             | 2017/18 | SMV167         |
| <u>*♂3</u>  | 2017/18 | SMV139         |
|             | 2017/18 | SMV155         |
|             | 2019/20 | SMV696         |
| <u>*♂7</u>  | 2017/18 | SMV141         |
|             | 2019/20 | SMV692         |
| <u>*♂8</u>  | 2017/18 | SMV144         |
|             | 2017/18 | SMV147         |
|             | 2019/20 | SMV692         |
| <u>*♂11</u> | 2017/18 | SMV144         |
|             | 2019/20 | SMV692         |
| <u>*♂17</u> | 2017/18 | SMV146         |
|             | 2018/19 | SMV228         |
| <u>*♂21</u> | 2017/18 | SMV154         |
|             | 2017/18 | SMV159         |
|             | 2019/20 | SMV141         |
| <u>*♂22</u> | 2017/18 | SMV154         |
|             | 2017/18 | SMV160         |
| <u>*♂25</u> | 2017/18 | SMV157         |
|             | 2018/19 | SMV216         |
|             | 2018/19 | SMV220         |
| <u>*♂28</u> | 2017/18 | SMV159         |
|             | 2017/18 | SMV160         |
| <u>*♂35</u> | 2017/18 | SMV165         |
|             | 2019/20 | SMV706         |
| <u>*♂41</u> | 2018/19 | SMV206         |
|             | 2019/20 | SMV702         |
